# Supplementary material for: Suspended nanoparticle crystal (S-NPC): A nanofluidics-based, electrical read-out biosensor
Source: Royal Society of Chemistry journal article supplement (doi:10.1039/c004758a), 2010-01-01
Supplement: c004758a.pdf [file c004758a.pdf]

**ESI 1: Ionic conductance of nanoparticle crystal (NPC)**

It has been proved that nanoparticles stacked by evaporation induced self-assembling prefers to be the face-centered-cubic (FCC) structure other than the hexagonal close-packed (HCP) one. Fig.S1(a) shows the FCC lattice (gray points). The interstices in the FCC structure have two kinds: the tetrahedron one (green points) and the octahedron one (red point). Every tetrahedron interstice connects to four adjacent octahedron ones and every octahedron interstice connects to eight tetrahedron ones. The connection between two adjacent interstices is treated as a nanochannel. The nanochannel is equivalent to a straight channel here, and the equivalent principle is that the two nanochannels have the same surface area and volume. It can be calculated that the exposing surface area ( $S_i$ ) and the interspaceal volume ( $V_i$ ) in a tetrahedron interstice are  $2.21r^2$  and  $0.208r^3$ , while  $r$  is the radius of the nanoparticle. Likewise, the exposing surface area ( $S_o$ ) and the interspaceal volume ( $V_o$ ) in an octahedron interstice can be calculated to be  $8.16r^2$  and  $1.05r^3$ . So, the surface area ( $S$ ) and the volume ( $V$ ) of one nanochannel are  $1.57r^2$  and  $0.183r^3$ . According to the equivalent principle, the length ( $r_s$ ) and the radius ( $l_s$ ) of the equivalent straight channels are  $0.237r$  and  $1.04r$ , respectively.

The conductance of a nanochannel with constant cross-section is,

$$G \sim 10^8 (\mu_+ + \mu_-) c_s N_A e \frac{S}{L} + \mu_+ \sigma_s \frac{P}{L} \quad (S1)$$

where  $\mu$ ,  $N_A$ ,  $c_s$ ,  $e$ ,  $S$ ,  $P$ ,  $L$  are the ion mobility, Avogadro constant, channel surface charge density, electron charge, effective cross-section area, cross-section perimeter, and channel length, respectively. Based on Eq. (S1) and the above equivalent relationship, the conductance of the nanochannel constructed by adjacent tetrahedron and octahedron interstices in the NPC can be estimated as,

$$G_0 \sim 1.64 \times 10^7 (\mu_+ + \mu_-) c_s r^2 + 143 \mu_+ \sigma_s \quad (S2)$$

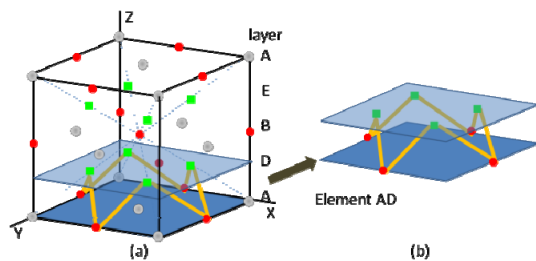

Figure S1. Packed nanoparticle with an FCC structure. (a) Schematic illustration of interstices and nanochannels in the FCC structure; (b) calculation unit between layer A and layer D in (a).

Considering the equivalence of X, Y and Z direction in the structure, as shown in Fig. S1(a), the Z direction (crystal direction  $\langle 001 \rangle$ ) is analyzed here. Nanoparticle in the crystal cell can be divided into three layers, layers A, B, and A. All the octahedron interstices in the crystal cell are at the same layer with the nanoparticles, while the tetrahedron ones are between the

nanoparticle layers, defined as layers D and E. Therefore, the nanochannel network can be divided into four series-connecting independent impedance elements, AD, DB, BE, and EA. Every impedance element is constituted by eight parallel nanochannels, i.e.  $G_e = 8G_0$ , as shown in Fig.S1 (b). Every impedance element has the same cross-section area ( $S_e$ ) of  $8r^2$  and length ( $L_e$ ) of  $\sqrt{2}r/2$ , so the conductivity can be calculated as,

$$Con_x = \frac{G_e L_e}{S_e} = \frac{8G_0 \frac{\sqrt{2}r}{2}}{8r^2} = \frac{G_0}{\sqrt{2}r} \quad (S3)$$

For a given material, the body conductivity can be characterized by a third-order tensor ( $3 \times 3$  matrix), while the diagonal of the matrix stands for the conductivity in the direction X, Y and Z, and the other elements in the matrix stand for the influence between every two directions. For example, while the electrical field  $E_X$  applied in direction X,  $Con_{XY}$  means that there will be a current ( $E_X Con_{XY}$ ) in direction Y. For the crystal structure shown in Fig.S1(a), the conductivities in directions X and Y are the same as that in direction Z and the other elements in the conductivity matrix are zeros (for electrical field applied in any direction, there wouldn't current in the other two directions), which means the conductivity of the nanochannel network is isotropic. Therefore, the conductivity along the direction of  $\langle 111 \rangle$ , exactly the direction for the measurement in this work, is the same as that of  $\langle 001 \rangle$ ,  $Con_z$  here.

The conductance of NPC with the cross-sectional area and the thickness of  $S_{NPC}$  and  $L_{NPC}$  is,

$$G_{NPC} = Con_x \frac{S_{NPC}}{L_{NPC}} = \left( 1.16 \times 10^7 (\mu_+ + \mu_-) c_s + 2.01 \mu_+ \frac{\sigma_s}{d} \right) \frac{S_{NPC}}{L_{NPC}} \quad (S4)$$

where  $d$  represents the diameter of the nanoparticle.

## ESI 2: Microfabrication of the micro-pore chip

As shown in Fig. S2, the micro-pore chip was fabricated by standard silicon fabrication process on a 4 inch, 400 $\mu\text{m}$  thick  $\langle 100 \rangle$  silicon wafer with 3000 $\text{\AA}$  oxide layer onside. Diameter of 20 $\mu\text{m}$  micro-pores were firstly patterned on the oxide layer, followed by low pressure chemical vapor deposition (LPCVD) of 1800 $\text{\AA}$  silicon nitride as the protection layer for the following KOH etching. After back side photolithography, silicon nitride and oxide were etched by corresponding RIEs, and then a suspended membrane of 50 $\mu\text{m}$  was form after a 350min KOH etching. Then the silicon nitride layer was removed, followed by inductive coupled plasma (ICP) etching through the silicon with the predefined  $\text{SiO}_2$  as the etching mask to achieve the micro-pore. At last, another 3000 $\text{\AA}$  thick oxide layer was thermally grown onto the wafer to function as the electrical barrier in the measurement.

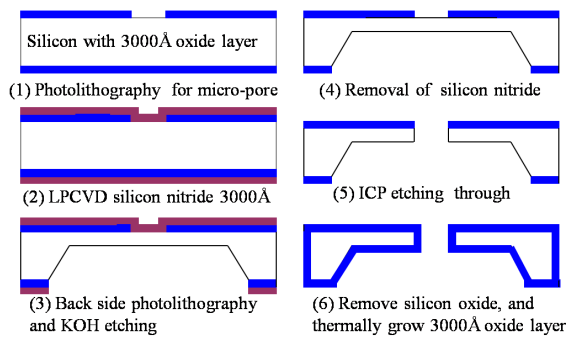

Figure S2. Fabrication process of the micro-pore chip (not in scale)

### ESI 3: Electrokinetics of the S-NPC

The conductance of a S-NPC constructed by 500nm bare silica nanoparticles with the electrolyte of  $10^{-5} \times$  PBS to  $1 \times$  PBS is shown in Fig.S3. The insert shows a typical impedance-spectrum of the S-NPC from 0.1 kHz to 100 kHz (log scale) at the ionic concentration of 1mM. At low frequency, capacitors of the electrode pair and their electrical double layers dominate the conductance, while at high frequency (10 kHz~100 kHz), the impedance levels to stable, which is mainly attributed to the conductance of the S-NPC. Therefore, the conductance of the S-NPC reported hereafter was measured at 100 kHz. At high ionic concentrations, the conductance of the S-NPC varied linearly with the electrolyte concentration, but at low concentrations, the conductance was insensitive to the buffer concentration, which meets exactly the electrokinetic property of an individual nanochannel. This critical concentration  $C_B$  can be calculated as 3.1mM in this case (the surface charge density  $\sigma_s$  is estimated as  $18\text{mC/m}^2$  as in reference [11]).

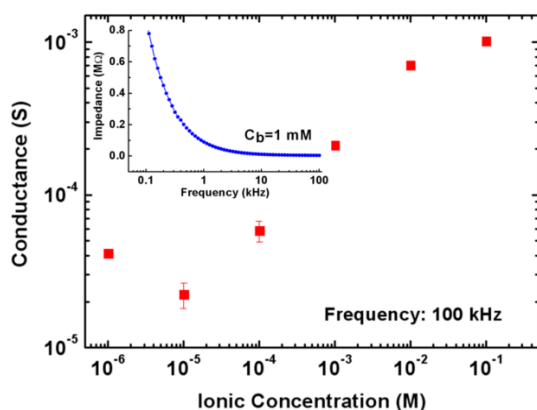

Figure S3. Ionic conductance of the S-NPC constructed by 500nm bare silica nanoparticles with the ion concentrations varied from  $1\mu\text{M}$  to  $0.1\text{M}$  (log scale) at frequency of 100kHz. Each point stands for three trials. The insert shows a typical impedance-spectrum of the S-NPC from 0.1kHz to 100kHz (log scale) at ion concentration of 1mM.
